# Supplementary material
Source: MDPI journal article supplement (https://www.mdpi.com/2073-4441/10/4/348)
Supplement: s1 [file s1]

## Sheet: Site A
Subsection	Id	T (m2)	K_(m/d)	Hydraulic Gradient	Q (m3/d)	Distance	hf	hs	M asl	Fresh water	Z (m asl)
A1	0	174.368	2.23734	0.00682467	1.19	0	0	-40.3855	-27	-27	-67.3855
A1	1	174.368	2.23734	0.00682467	1.19	50	0.826181	-75.2987	-26	-25.1738	-101.299
A1	2	174.368	2.23734	0.00682467	1.19	100	1.1684	-98.5332	-26	-24.8316	-124.533
A1	3	174.368	2.23734	0.00682467	1.19	150	1.43099	-117.251	-26	-24.569	-143.251
A1	4	174.368	2.23734	0.00682467	1.19	200	1.65236	-133.366	-26	-24.3476	-159.366
A1	5	174.368	2.23734	0.00682467	1.19	250	1.8474	-147.735	-25.5	-23.6526	-173.235
A1	6	174.368	2.23734	0.00682467	1.19	300	2.02372	-160.824	-25.5	-23.4763	-186.324
A1	7	174.368	2.23734	0.00682467	1.19	350	2.18587	-172.926	-25.5	-23.3141	-198.426
A1	8	174.368	2.23734	0.00682467	1.19	400	2.33679	-184.234	-25.5	-23.1632	-209.734
A1	9	174.368	2.23734	0.00682467	1.19	450	2.47854	-194.887	-25.5	-23.0215	-220.387
A1	10	174.368	2.23734	0.00682467	1.19	500	2.61261	-204.988	-25	-22.3874	-229.988
A1	11	174.368	2.23734	0.00682467	1.19	600	2.86197	-223.825	-25	-22.138	-248.825
A1	12	174.368	2.23734	0.00682467	1.19	800	3.30472	-257.397	-25	-21.6953	-282.397
A1	13	174.368	2.23734	0.00682467	1.19	1100	3.87513	-300.81	-24	-20.1249	-324.81
A1	14	174.368	2.23734	0.00682467	1.19	1500	4.52518	-350.426	-24	-19.4748	-374.426
A1	15	174.368	2.23734	0.00682467	1.19	2000	5.22523	-403.964	-22	-16.7748	-425.964
A2	0	75.7755	4.11985	0.007328	0.555283	0	0	-10.2339	-26	-26	-36.2339
A2	1	75.7755	2.11985	0.007328	0.555283	50	0.579792	-48.8333	-26	-25.4202	-74.8333
A2	2	75.7755	2.11985	0.007328	0.555283	100	0.819949	-66.1346	-26	-25.1801	-92.1346
A2	3	75.7755	2.11985	0.007328	0.555283	150	1.00423	-79.7677	-26	-24.9958	-105.768
A2	4	75.7755	2.11985	0.007328	0.555283	200	1.15958	-91.3892	-26	-24.8404	-117.389
A2	5	75.7755	2.11985	0.007328	0.555283	250	1.29645	-101.691	-25.5	-24.2035	-127.191
A2	6	75.7755	2.11985	0.007328	0.555283	300	1.42019	-111.041	-25.5	-24.0798	-136.541
A2	7	75.7755	2.11985	0.007328	0.555283	350	1.53398	-119.663	-25.5	-23.966	-145.163
A2	8	75.7755	2.11985	0.007328	0.555283	400	1.6399	-127.704	-25.5	-23.8601	-153.204
A2	9	75.7755	2.11985	0.007328	0.555283	450	1.73937	-135.268	-25.5	-23.7606	-160.768
A2	10	75.7755	2.11985	0.007328	0.555283	500	1.83346	-142.431	-25	-23.1665	-167.431
A2	11	75.7755	2.11985	0.007328	0.555283	600	2.00846	-155.772	-25	-22.9915	-180.772
A2	12	75.7755	2.11985	0.007328	0.555283	800	2.31917	-179.503	-25	-22.6808	-204.503
A2	13	75.7755	2.11985	0.007328	0.555283	1100	2.71946	-210.133	-24	-21.2805	-234.133
A2	14	75.7755	2.11985	0.007328	0.555283	1500	3.17565	-245.089	-24	-20.8244	-269.089
A2	15	75.7755	2.11985	0.007328	0.555283	2000	3.66692	-282.771	-22	-18.3331	-304.771
A3	0	147.635	2.26508	0.008182	1.20795	0	0	-40.4925	-26	-26	-66.4925
A3	1	147.635	2.26508	0.008182	1.20795	50	0.827274	-75.4271	-26	-25.1727	-101.427
A3	2	147.635	2.26508	0.008182	1.20795	100	1.16994	-98.6856	-26	-24.8301	-124.686
A3	3	147.635	2.26508	0.008182	1.20795	150	1.43288	-117.424	-26	-24.5671	-143.424
A3	4	147.635	2.26508	0.008182	1.20795	200	1.65455	-133.559	-26	-24.3455	-159.559
A3	5	147.635	2.26508	0.008182	1.20795	250	1.84984	-147.945	-25.5	-23.6502	-173.445
A3	6	147.635	2.26508	0.008182	1.20795	300	2.0264	-161.05	-25.5	-23.4736	-186.55
A3	7	147.635	2.26508	0.008182	1.20795	350	2.18876	-173.167	-25.5	-23.3112	-198.667
A3	8	147.635	2.26508	0.008182	1.20795	400	2.33989	-184.49	-25.5	-23.1601	-209.99
A3	9	147.635	2.26508	0.008182	1.20795	450	2.48182	-195.157	-25.5	-23.0182	-220.657
A3	10	147.635	2.26508	0.008182	1.20795	500	2.61607	-205.27	-25	-22.3839	-230.27
A3	11	147.635	2.26508	0.008182	1.20795	600	2.86576	-224.131	-25	-22.1342	-249.131
A3	12	147.635	2.26508	0.008182	1.20795	800	3.3091	-257.747	-25	-21.6909	-282.747
A3	13	147.635	2.26508	0.008182	1.20795	1100	3.88026	-301.216	-24	-20.1197	-325.216
A3	14	147.635	2.26508	0.008182	1.20795	1500	4.53117	-350.896	-24	-19.4688	-374.896
A3	15	147.635	2.26508	0.008182	1.20795	2000	5.23214	-404.504	-22	-16.7679	-426.504

## Sheet: Site B
Subsection	Id	T (m2)	K_(m/d)	Hydraulic Gradient	Q (m3/d)	Distance	hf	hs	M asl	Fresh water	Z (m asl)
B1	0	211.865	3.01769	0.00403267	0.854382	0	0	-21.4975	-27	-27	-48.4975
B1	1	211.865	3.01769	0.00403267	0.854382	50	0.602776	-51.1084	-27	-26.3972	-78.1084
B1	2	211.865	3.01769	0.00403267	0.854382	100	0.852453	-69.0073	-27	-26.1475	-96.0073
B1	3	211.865	3.01769	0.00403267	0.854382	150	1.04404	-83.138	-27	-25.956	-110.138
B1	4	211.865	3.01769	0.00403267	0.854382	200	1.20555	-95.1938	-27	-25.7944	-122.194
B1	5	211.865	3.01769	0.00403267	0.854382	250	1.34785	-105.886	-27	-25.6522	-132.886
B1	6	211.865	3.01769	0.00403267	0.854382	300	1.47649	-115.593	-26	-24.5235	-141.593
B1	7	211.865	3.01769	0.00403267	0.854382	350	1.59479	-124.546	-26	-24.4052	-150.546
B1	8	211.865	3.01769	0.00403267	0.854382	400	1.70491	-132.897	-26	-24.2951	-158.897
B1	9	211.865	3.01769	0.00403267	0.854382	450	1.80833	-140.753	-26	-24.1917	-166.753
B1	10	211.865	3.01769	0.00403267	0.854382	500	1.90614	-148.194	-25	-23.0939	-173.194
B1	11	211.865	3.01769	0.00403267	0.854382	600	2.08808	-162.053	-25	-22.9119	-187.053
B1	12	211.865	3.01769	0.00403267	0.854382	800	2.4111	-186.711	-25	-22.5889	-211.711
B1	13	211.865	3.01769	0.00403267	0.854382	1100	2.82727	-218.542	-24	-21.1727	-242.542
B1	14	211.865	3.01769	0.00403267	0.854382	1500	3.30154	-254.873	-23	-19.6985	-277.873
B1	15	211.865	3.01769	0.00403267	0.854382	2000	3.81229	-294.04	-23	-19.1877	-317.04
B2	0	205.816	2.98684	0.004828	0.99368	0	0	-25.2607	-27	-27	-52.2607
B2	1	205.816	2.98684	0.004828	0.99368	50	0.653408	-56.2529	-27	-26.3466	-83.2529
B2	2	205.816	2.98684	0.004828	0.99368	100	0.924058	-75.4365	-27	-26.0759	-102.437
B2	3	205.816	2.98684	0.004828	0.99368	150	1.13174	-90.6474	-27	-25.8683	-117.647
B2	4	205.816	2.98684	0.004828	0.99368	200	1.30682	-103.65	-27	-25.6932	-130.65
B2	5	205.816	2.98684	0.004828	0.99368	250	1.46106	-115.193	-27	-25.5389	-142.193
B2	6	205.816	2.98684	0.004828	0.99368	300	1.60052	-125.681	-26	-24.3995	-151.681
B2	7	205.816	2.98684	0.004828	0.99368	350	1.72875	-135.359	-26	-24.2712	-161.359
B2	8	205.816	2.98684	0.004828	0.99368	400	1.84812	-144.39	-26	-24.1519	-170.39
B2	9	205.816	2.98684	0.004828	0.99368	450	1.96022	-152.888	-26	-24.0398	-178.888
B2	10	205.816	2.98684	0.004828	0.99368	500	2.06626	-160.938	-25	-22.9337	-185.938
B2	11	205.816	2.98684	0.004828	0.99368	600	2.26347	-175.936	-25	-22.7365	-200.936
B2	12	205.816	2.98684	0.004828	0.99368	800	2.61363	-202.629	-25	-22.3864	-227.629
B2	13	205.816	2.98684	0.004828	0.99368	1100	3.06475	-237.1	-24	-20.9352	-261.1
B2	14	205.816	2.98684	0.004828	0.99368	1500	3.57886	-276.454	-23	-19.4211	-299.454
B2	15	205.816	2.98684	0.004828	0.99368	2000	4.13251	-318.888	-23	-18.8675	-341.888
B3	0	203.321	2.88852	0.00392333	0.797695	0	0	-20.9687	-27	-27	-47.9687
B3	1	203.321	2.88852	0.00392333	0.797695	50	0.595316	-50.366	-27	-26.4047	-77.366
B3	2	203.321	2.88852	0.00392333	0.797695	100	0.841904	-68.0719	-27	-26.1581	-95.0719
B3	3	203.321	2.88852	0.00392333	0.797695	150	1.03112	-82.0416	-27	-25.9689	-109.042
B3	4	203.321	2.88852	0.00392333	0.797695	200	1.19063	-93.9567	-27	-25.8094	-120.957
B3	5	203.321	2.88852	0.00392333	0.797695	250	1.33117	-104.522	-27	-25.6688	-131.522
B3	6	203.321	2.88852	0.00392333	0.797695	300	1.45822	-114.114	-26	-24.5418	-140.114
B3	7	203.321	2.88852	0.00392333	0.797695	350	1.57506	-122.959	-26	-24.4249	-148.959
B3	8	203.321	2.88852	0.00392333	0.797695	400	1.68381	-131.21	-26	-24.3162	-157.21
B3	9	203.321	2.88852	0.00392333	0.797695	450	1.78595	-138.972	-26	-24.2141	-164.972
B3	10	203.321	2.88852	0.00392333	0.797695	500	1.88255	-146.322	-25	-23.1174	-171.322
B3	11	203.321	2.88852	0.00392333	0.797695	600	2.06223	-160.013	-25	-22.9378	-185.013
B3	12	203.321	2.88852	0.00392333	0.797695	800	2.38126	-184.37	-25	-22.6187	-209.37
B3	13	203.321	2.88852	0.00392333	0.797695	1100	2.79228	-215.812	-24	-21.2077	-239.812
B3	14	203.321	2.88852	0.00392333	0.797695	1500	3.26068	-251.696	-23	-19.7393	-274.696
B3	15	203.321	2.88852	0.00392333	0.797695	2000	3.76511	-290.382	-23	-19.2349	-313.382

## Sheet: Site C
Subsection	Id	T (m2)	K_(m/d)	Hydraulic Gradient	Q (m3/d)	Distance	hf	hs	M asl	Fresh water	Z (m asl)
C1	0	175.576	1.6006	0.000692667	0.121616	0	0	-5.76923	-27	-27	-32.7692
C1	1	175.576	1.6006	0.000692667	0.121616	50	0.312263	-24.7034	-27	-26.6877	-51.7034
C1	2	175.576	1.6006	0.000692667	0.121616	100	0.441607	-34.4562	-27	-26.5584	-61.4562
C1	3	175.576	1.6006	0.000692667	0.121616	150	0.540856	-42.0024	-27	-26.4591	-69.0024
C1	4	175.576	1.6006	0.000692667	0.121616	200	0.624527	-48.3857	-27	-26.3755	-75.3857
C1	5	175.576	1.6006	0.000692667	0.121616	250	0.698242	-54.0199	-26	-25.3018	-80.0199
C1	6	175.576	1.6006	0.000692667	0.121616	300	0.764886	-59.1195	-26	-25.2351	-85.1195
C1	7	175.576	1.6006	0.000692667	0.121616	350	0.826171	-63.8129	-26	-25.1738	-89.8129
C1	8	175.576	1.6006	0.000692667	0.121616	400	0.883214	-68.184	-26	-25.1168	-94.184
C1	9	175.576	1.6006	0.000692667	0.121616	450	0.93679	-72.2913	-26	-25.0632	-98.2913
C1	10	175.576	1.6006	0.000692667	0.121616	500	0.987463	-76.1775	-25	-24.0125	-101.177
C1	11	175.576	1.6006	0.000692667	0.121616	600	1.08171	-83.4084	-25	-23.9183	-108.408
C1	12	175.576	1.6006	0.000692667	0.121616	800	1.24905	-96.2541	-25	-23.7509	-121.254
C1	13	175.576	1.6006	0.000692667	0.121616	1100	1.46464	-112.813	-24	-22.5354	-136.813
C1	14	175.576	1.6006	0.000692667	0.121616	1500	1.71034	-131.691	-23	-21.2897	-154.691
C1	15	175.576	1.6006	0.000692667	0.121616	2000	1.97493	-152.027	-23	-21.0251	-175.027
C2	0	42.8973	1.75576	0.004704	0.201789	0	0	-8.72656	-27	-27	-35.7266
C2	1	42.8973	1.75576	0.004704	0.201789	50	0.384046	-30.804	-27	-26.616	-57.804
C2	2	42.8973	1.75576	0.004704	0.201789	100	0.543124	-42.6804	-27	-26.4569	-69.6804
C2	3	42.8973	1.75576	0.004704	0.201789	150	0.665188	-51.9071	-27	-26.3348	-78.9071
C2	4	42.8973	1.75576	0.004704	0.201789	200	0.768093	-59.725	-27	-26.2319	-86.725
C2	5	42.8973	1.75576	0.004704	0.201789	250	0.858754	-66.6319	-26	-25.1412	-92.6319
C2	6	42.8973	1.75576	0.004704	0.201789	300	0.940718	-72.8872	-26	-25.0593	-98.8872
C2	7	42.8973	1.75576	0.004704	0.201789	350	1.01609	-78.6465	-26	-24.9839	-104.647
C2	8	42.8973	1.75576	0.004704	0.201789	400	1.08625	-84.0119	-26	-24.9138	-110.012
C2	9	42.8973	1.75576	0.004704	0.201789	450	1.15214	-89.0547	-26	-24.8479	-115.055
C2	10	42.8973	1.75576	0.004704	0.201789	500	1.21446	-93.8268	-25	-23.7855	-118.827
C2	11	42.8973	1.75576	0.004704	0.201789	600	1.33038	-102.708	-25	-23.6696	-127.708
C2	12	42.8973	1.75576	0.004704	0.201789	800	1.53619	-118.49	-25	-23.4638	-143.49
C2	13	42.8973	1.75576	0.004704	0.201789	1100	1.80134	-138.839	-24	-22.1987	-162.839
C2	14	42.8973	1.75576	0.004704	0.201789	1500	2.10351	-162.044	-23	-20.8965	-185.044
C2	15	42.8973	1.75576	0.004704	0.201789	2000	2.42892	-187.044	-23	-20.5711	-210.044
C3	0	147.923	4.09771	0.004704	0.695828	0	0	-12.8935	-27	-27	-39.8935
C3	1	147.923	4.09771	0.004704	0.695828	50	0.466818	-38.1537	-27	-26.5332	-65.1537
C3	2	147.923	4.09771	0.004704	0.695828	100	0.66018	-52.3943	-27	-26.3398	-79.3943
C3	3	147.923	4.09771	0.004704	0.695828	150	0.808552	-63.5187	-27	-26.1914	-90.5187
C3	4	147.923	4.09771	0.004704	0.695828	200	0.933635	-72.9663	-27	-26.0664	-99.9663
C3	5	147.923	4.09771	0.004704	0.695828	250	1.04384	-81.3237	-26	-24.9562	-107.324
C3	6	147.923	4.09771	0.004704	0.695828	300	1.14347	-88.8988	-26	-24.8565	-114.899
C3	7	147.923	4.09771	0.004704	0.695828	350	1.23508	-95.8773	-26	-24.7649	-121.877
C3	8	147.923	4.09771	0.004704	0.695828	400	1.32036	-102.381	-26	-24.6796	-128.381
C3	9	147.923	4.09771	0.004704	0.695828	450	1.40045	-108.496	-26	-24.5995	-134.496
C3	10	147.923	4.09771	0.004704	0.695828	500	1.47621	-114.284	-25	-23.5238	-139.284
C3	11	147.923	4.09771	0.004704	0.695828	600	1.6171	-125.059	-25	-23.3829	-150.059
C3	12	147.923	4.09771	0.004704	0.695828	800	1.86727	-144.214	-25	-23.1327	-169.214
C3	13	147.923	4.09771	0.004704	0.695828	1100	2.18957	-168.921	-24	-21.8104	-192.921
C3	14	147.923	4.09771	0.004704	0.695828	1500	2.55687	-197.104	-23	-20.4431	-220.104
C3	15	147.923	4.09771	0.004704	0.695828	2000	2.95241	-227.474	-23	-20.0476	-250.474

## Sheet: Site D
Subsection	Id	T (m2)	K_(m/d)	Hydraulic Gradient	Q (m3/d)	Distance	hf	hs	M asl	Fresh water	Z (m asl)
D1	0	48.1333	2.3936	0.00393133	0.189228	0	0	-6.00266	-27	-27	-33.0027
D1	1	48.1333	2.3936	0.00393133	0.189228	50	0.318518	-25.226	-27	-26.6815	-52.226
D1	2	48.1333	2.3936	0.00393133	0.189228	100	0.450452	-35.1663	-27	-26.5495	-62.1663
D1	3	48.1333	2.3936	0.00393133	0.189228	150	0.551689	-42.8601	-27	-26.4483	-69.8601
D1	4	48.1333	2.3936	0.00393133	0.189228	200	0.637036	-49.369	-27	-26.363	-76.369
D1	5	48.1333	2.3936	0.00393133	0.189228	250	0.712228	-55.1146	-27	-26.2878	-82.1146
D1	6	48.1333	2.3936	0.00393133	0.189228	300	0.780207	-60.3153	-26	-25.2198	-86.3153
D1	7	48.1333	2.3936	0.00393133	0.189228	350	0.842719	-65.1019	-26	-25.1573	-91.1019
D1	8	48.1333	2.3936	0.00393133	0.189228	400	0.900905	-69.5599	-26	-25.0991	-95.5599
D1	9	48.1333	2.3936	0.00393133	0.189228	450	0.955554	-73.7488	-26	-25.0444	-99.7488
D1	10	48.1333	2.3936	0.00393133	0.189228	500	1.00724	-77.7123	-26	-24.9928	-103.712
D1	11	48.1333	2.3936	0.00393133	0.189228	600	1.10338	-85.0873	-26	-24.8966	-111.087
D1	12	48.1333	2.3936	0.00393133	0.189228	800	1.27407	-98.1892	-26	-24.7259	-124.189
D1	13	48.1333	2.3936	0.00393133	0.189228	1100	1.49398	-115.078	-25	-23.506	-140.078
D1	14	48.1333	2.3936	0.00393133	0.189228	1500	1.74459	-134.334	-23	-21.2554	-157.334
D1	15	48.1333	2.3936	0.00393133	0.189228	2000	2.01448	-155.077	-23	-20.9855	-178.077
D2	0	62.0667	5.58727	0.00251067	0.155829	0	0	-2.11767	-27	-27	-29.1177
D2	1	62.0667	5.58727	0.00251067	0.155829	50	0.189187	-14.7061	-27	-26.8108	-41.7061
D2	2	62.0667	5.58727	0.00251067	0.155829	100	0.267551	-20.6895	-27	-26.7324	-47.6895
D2	3	62.0667	5.58727	0.00251067	0.155829	150	0.327681	-25.2951	-27	-26.6723	-52.2951
D2	4	62.0667	5.58727	0.00251067	0.155829	200	0.378374	-29.1826	-27	-26.6216	-56.1826
D2	5	62.0667	5.58727	0.00251067	0.155829	250	0.423035	-32.61	-27	-26.577	-59.61
D2	6	62.0667	5.58727	0.00251067	0.155829	300	0.463411	-35.7099	-26	-25.5366	-61.7099
D2	7	62.0667	5.58727	0.00251067	0.155829	350	0.500541	-38.5614	-26	-25.4995	-64.5614
D2	8	62.0667	5.58727	0.00251067	0.155829	400	0.535101	-41.2161	-26	-25.4649	-67.2161
D2	9	62.0667	5.58727	0.00251067	0.155829	450	0.567561	-43.7098	-26	-25.4324	-69.7098
D2	10	62.0667	5.58727	0.00251067	0.155829	500	0.598261	-46.0688	-26	-25.4017	-72.0688
D2	11	62.0667	5.58727	0.00251067	0.155829	600	0.655363	-50.457	-26	-25.3446	-76.457
D2	12	62.0667	5.58727	0.00251067	0.155829	800	0.756747	-58.2498	-26	-25.2433	-84.2498
D2	13	62.0667	5.58727	0.00251067	0.155829	1100	0.887365	-68.2917	-25	-24.1126	-93.2917
D2	14	62.0667	5.58727	0.00251067	0.155829	1500	1.03622	-79.7373	-23	-21.9638	-102.737
D2	15	62.0667	5.58727	0.00251067	0.155829	2000	1.19652	-92.0646	-23	-21.8035	-115.065
D3	0	38.296	2.7772	0.00133	0.0509337	0	0	-1.39254	-27	-27	-28.3925
D3	1	38.296	2.7772	0.00133	0.0509337	50	0.153414	-11.883	-27	-26.8466	-38.883
D3	2	38.296	2.7772	0.00133	0.0509337	100	0.216961	-16.7473	-27	-26.783	-43.7473
D3	3	38.296	2.7772	0.00133	0.0509337	150	0.265721	-20.4875	-27	-26.7343	-47.4875
D3	4	38.296	2.7772	0.00133	0.0509337	200	0.306829	-23.6432	-27	-26.6932	-50.6432
D3	5	38.296	2.7772	0.00133	0.0509337	250	0.343045	-26.4248	-27	-26.657	-53.4248
D3	6	38.296	2.7772	0.00133	0.0509337	300	0.375787	-28.9402	-26	-25.6242	-54.9402
D3	7	38.296	2.7772	0.00133	0.0509337	350	0.405896	-31.2538	-26	-25.5941	-57.2538
D3	8	38.296	2.7772	0.00133	0.0509337	400	0.433921	-33.4076	-26	-25.5661	-59.4076
D3	9	38.296	2.7772	0.00133	0.0509337	450	0.460243	-35.4307	-26	-25.5398	-61.4307
D3	10	38.296	2.7772	0.00133	0.0509337	500	0.485138	-37.3443	-26	-25.5149	-63.3443
D3	11	38.296	2.7772	0.00133	0.0509337	600	0.531443	-40.9039	-26	-25.4686	-66.9039
D3	12	38.296	2.7772	0.00133	0.0509337	800	0.613657	-47.2249	-26	-25.3863	-73.2249
D3	13	38.296	2.7772	0.00133	0.0509337	1100	0.719577	-55.3696	-25	-24.2804	-80.3696
D3	14	38.296	2.7772	0.00133	0.0509337	1500	0.840284	-64.6523	-23	-22.1597	-87.6523
D3	15	38.296	2.7772	0.00133	0.0509337	2000	0.970277	-74.6497	-23	-22.0297	-97.6497
